# Supplementary material for: Large scale genomic reorganization of topological domains at the HoxD locus
Source: PubMed Central journal article supplement (PMC5547506; doi:10.1186/s13059-017-1278-z), 2017-08-07
Supplement: 13059_2017_1278_MOESM1_ESM.pdf [file 13059_2017_1278_MOESM1_ESM.pdf]

**Title:**

**LARGE SCALE GENOMIC REORGANIZATION OF TOPOLOGICAL DOMAINS  
AT THE *HoxD* LOCUS**

**Running Title:** TAD formation at the *HoxD* locus

**Authors:**

Pierre J. Fabre<sup>1</sup>, Marion Leleu<sup>1</sup>, Benjamin H. Mormann<sup>1</sup>, Lucille Lopez-Delisle<sup>1</sup>, Daan  
Noordermeer<sup>1,3</sup> Leonardo Beccari<sup>2</sup> and Denis Duboule<sup>1,2,\*</sup>

***ADDITIONAL FILE 1***

***Supplementary Figures 1 to 4 with legends***

***Supplementary tables S1 and S2***

## Supplementary Figure S1

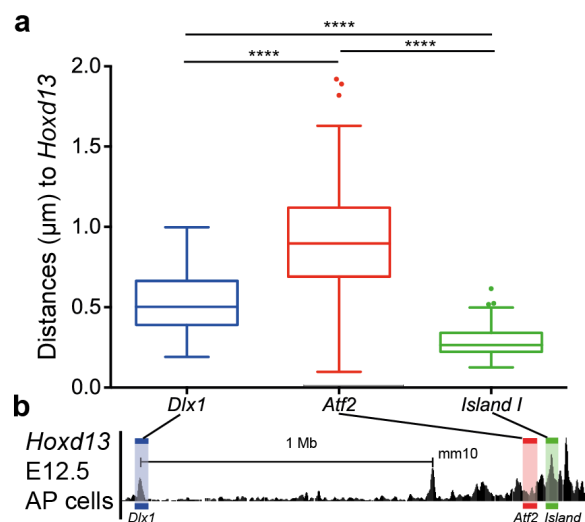

### Figure S1. FISH distances are inversely correlated to the peak intensity as observed in 4C.

**a.** Quantitation of DNA-FISH signals showing inter-probe distances between *Hoxd13* and either a strong interacting region (island I), a weak interacting region (*Dlx1*) or a non-interacting region (*Atf2*). Kruskal-Wallis test was followed by Dunn's multiple comparison test: \*\*\*\*  $p < 0.0001$ . Numbers of pairs analyzed are: 197 (*Dlx1*), 159 (*Atf2*) and 139 (island I). **b.** 4C interaction profiles (normalized signals) of *Hoxd13* in wild-type autopod cells, isolated from E12.5 embryonic mouse forelimb. The position of the three FISH probes used in **a** for *Dlx1* (blue), *Atf2* (red) and island I (green) are shown above the 4C profile.

## Supplementary Figure S2

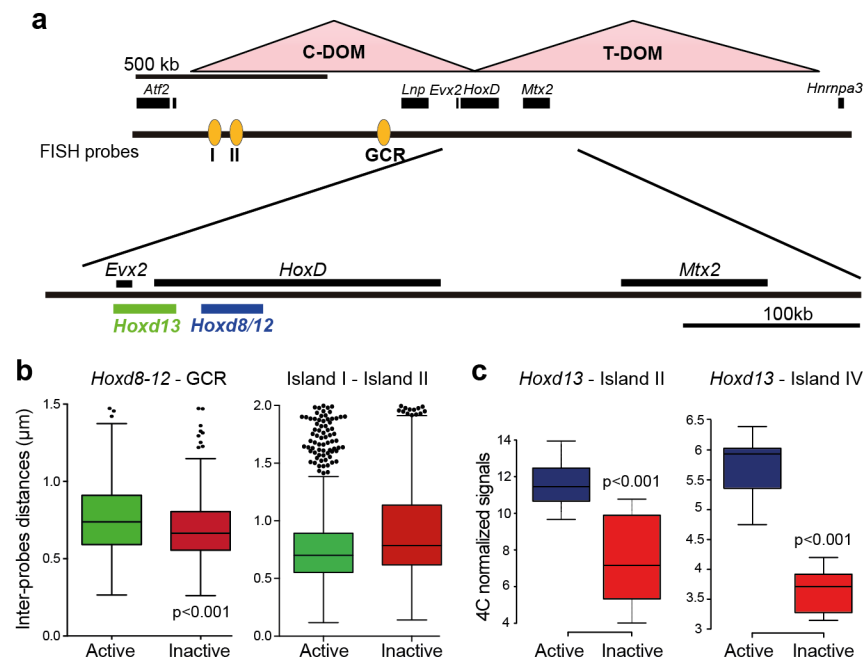

**Figure S2: Quantifications of *Hoxd13* interactions with the regulatory islands using DNA-FISH and 4C-Seq in autopod (active) and zeugopod (inactive) cells.** **a**, Schematic showing the position of the probes used for the quantification shown below. **b**, 3D-DNA distance measurements for four pairs of fosmid probes: *Hoxd8-Hoxd12*-GCR and island I – island II (Mann-Whitney test). **c**, Quantifications showing the normalized interaction signals from smoothed 4C-Seq either in autopod (active) or in zeugopod (inactive) tissue (pairwise Wilcoxon Rank Sum Tests, followed by BH corrections for multiple testing).

## Supplementary Figure S3

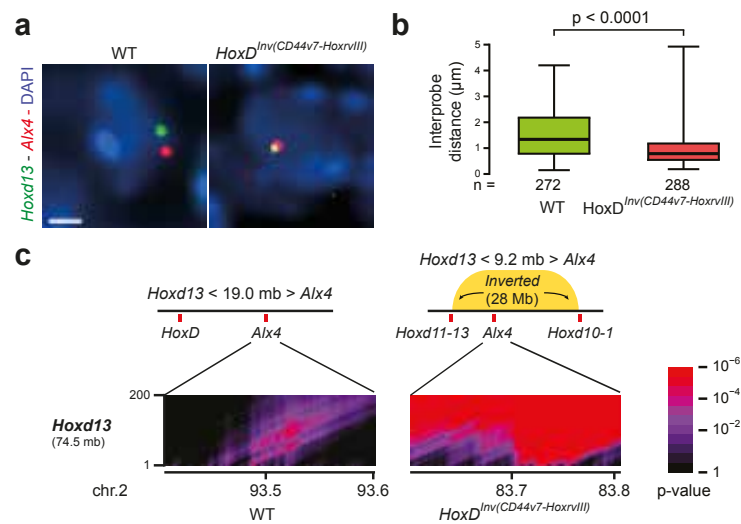

**Figure S3: Reducing genomic distances can modulate the contacts between elements located at trans-TAD distances.** **a**, DNA-FISH signals showing the greater proximity between *Hoxd13* and *Alx4* in the large telomeric *HoxD*<sup>Inv(CD44v7-HoxrvIII)</sup> inversion. **b**, Quantitation of distances as observed in **a** shows a clear increase in proximity in the inverted situation (Mann-Whitney test). **c**, Magnification within a 200 kb large interval centered on *Alx4* on the 4C-seq from *Hoxd13* domainogram showing the increase of contacts in the inverted situation.

## Supplementary Figure S4

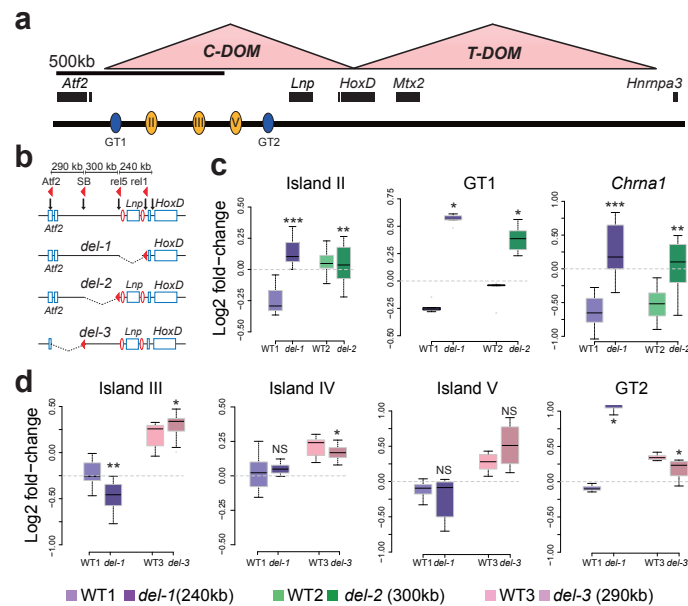

**Figure S4: 4C-seq quantitations of *Hoxd13* interactions with its regulatory islands in distal limb cells (autopod).** **a**, Schematic showing the position of the region used for the quantitation of 4C-seq signals shown below. **b**, Schematic showing the breakpoints and the position of the deletions. **c**, Quantitations showing the normalized interaction signals (on three wild type replicates) from 4C-seq for island II, GT1 and *Chrna1* in *del-1* and *del-2* compared to their internal control. **d**, Quantitations showing the normalized interactions signals (on three wild type replicates) from 4C-seq for island III, island V and GT2 in *del-1* and *del-3* compared to their internal control. (\* denotes  $p < 0.01$  \*\* denotes  $p < 10^{-5}$  and \*\*\* denotes  $p < 10^{-7}$  compared with Wilcoxon rank sum test).

Supplementary table 1

| Gene transcript ID                      | Mean          | WT            | Inv(TpSB1-Itga6) | FC          | p-value          | adj. p-value    |
|-----------------------------------------|---------------|---------------|------------------|-------------|------------------|-----------------|
| ENSMUSG00000079277 Hoxd3 1 chr2         | 78.62         | 18.11         | 139.12           | 7.68        | 1.10E-07         | 6.39E-05        |
| ENSMUSG00000027318 Adam33 -1 chr2       | 37.82         | 9.06          | 66.58            | 7.35        | 0.0013975        | 0.12640508      |
| ENSMUSG00000085028 Gm14462 1 chr2       | 130.92        | 40.25         | 221.6            | 5.5         | 0.0016833        | 0.143947728     |
| ENSMUSG00000026950 Neb -1 chr2          | 148.86        | 47.3          | 250.41           | 5.29        | 0.0121658        | 0.547041645     |
| ENSMUSG00000051747 Ttn -1 chr2          | 338.64        | 123.78        | 553.49           | 4.47        | 0.7025719        | 1               |
| ENSMUSG00000069049 Eif2s3y 1 chrY       | 369.02        | 135.86        | 602.18           | 4.43        | 0.0820751        | 1               |
| ENSMUSG00000090086 Al480526 -1 chr5     | 501.5         | 186.17        | 816.82           | 4.39        | 8.53E-06         | 0.002573138     |
| ENSMUSG00000021268 Meg3 1 chr12         | 999.06        | 378.38        | 1619.73          | 4.28        | 0.0005088        | 0.061994357     |
| ENSMUSG00000042464 Hoxd4 1 chr2         | 42.33         | 16.1          | 68.57            | 4.26        | 0.0001021        | 0.019848229     |
| <b>ENSMUSG00000041911 Dlx1 1 chr2</b>   | <b>533.98</b> | <b>215.36</b> | <b>852.6</b>     | <b>3.96</b> | <b>0.6070721</b> | <b>1</b>        |
| ENSMUSG00000086878 Miat -1 chr5         | 401.98        | 162.02        | 641.93           | 3.96        | 0.2848759        | 1               |
| ENSMUSG00000047686 Zcchc5 -1 chrX       | 281.45        | 115.73        | 447.17           | 3.86        | 0.5959724        | 1               |
| ENSMUSG00000047909 Ankrd16 1 chr2       | 512.6         | 213.34        | 811.85           | 3.81        | 0.0001608        | 0.025578472     |
| ENSMUSG00000089726 Mir17hg 1 chr14      | 242.6         | 101.64        | 383.57           | 3.77        | 0.7273328        | 1               |
| ENSMUSG00000020908 Myh3 1 chr11         | 451.34        | 190.2         | 712.48           | 3.75        | 0.0865705        | 1               |
| ENSMUSG00000080316 Ncrna00085 1 chr17   | 337.77        | 143.91        | 531.63           | 3.69        | 9.02E-15         | 3.54E-11        |
| ENSMUSG00000068457 Uty -1 chrY          | 326.82        | 140.89        | 512.75           | 3.64        | 3.28E-11         | 4.54E-08        |
| ENSMUSG00000059022 Kcp -1 chr6          | 232.15        | 232.46        | 813.84           | 3.5         | 5.19E-139        | 1.22E-134       |
| <b>ENSMUSG00000023391 Dlx2 -1 chr2</b>  | <b>476.86</b> | <b>219.38</b> | <b>734.34</b>    | <b>3.35</b> | <b>4.03E-23</b>  | <b>4.74E-19</b> |
| ENSMUSG00000056673 Kdm5d 1 chrY         | 589.49        | 272.72        | 906.26           | 3.32        | 2.47E-16         | 1.45E-12        |
| ENSMUSG00000038390 Gpr162 -1 chr6       | 333.39        | 158           | 508.77           | 3.22        | 5.56E-16         | 2.62E-12        |
| ENSMUSG00000015377 Fam116b -1 chr15     | 269.61        | 129.82        | 409.4            | 3.15        | 9.02E-15         | 3.54E-11        |
| ENSMUSG00000020875 Hoxb9 1 chr11        | 70.27         | 34.22         | 106.33           | 3.11        | 9.34E-14         | 3.14E-10        |
| ENSMUSG00000053332 Gas5 1 chr1          | 1255.99       | 625.94        | 1886.04          | 3.01        | 2.13E-13         | 6.27E-10        |
| ENSMUSG00000090867 Snhg1 1 chr19        | 588.13        | 294.86        | 881.41           | 2.99        | 8.37E-13         | 2.19E-09        |
| ENSMUSG00000034771 Tle2 1 chr10         | 365.37        | 187.18        | 543.55           | 2.9         | 1.60E-12         | 3.14E-09        |
| ENSMUSG00000069045 Ddx3y -1 chrY        | 534.41        | 283.79        | 785.02           | 2.77        | 1.52E-12         | 3.14E-09        |
| ENSMUSG00000030409 Dmpk 1 chr7          | 385.35        | 204.29        | 566.41           | 2.77        | 1.55E-12         | 3.14E-09        |
| ENSMUSG00000033453 Adamts15 -1 chr9     | 849.48        | 453.86        | 1245.11          | 2.74        | 1.75E-12         | 3.16E-09        |
| ENSMUSG00000085385 9430008C03Rik -1 chr | 537.93        | 290.83        | 785.02           | 2.7         | 1.08E-11         | 1.81E-08        |
| ENSMUSG00000055254 Ntrk2 1 chr13        | 392.85        | 212.34        | 573.37           | 2.7         | 1.68E-11         | 2.63E-08        |
| ENSMUSG00000059540 Tcea2 1 chr2         | 210.92        | 119.75        | 302.09           | 2.52        | 3.00E-11         | 4.41E-08        |
| ENSMUSG00000031167 Rbm3 -1 chrX         | 538.53        | 307.94        | 769.12           | 2.5         | 3.28E-11         | 4.54E-08        |
| ENSMUSG00000035967 Ddx26b 1 chrX        | 684.16        | 394.48        | 973.83           | 2.47        | 8.98E-11         | 1.17E-07        |
| ENSMUSG0000006576 Slc4a3 1 chr1         | 589.44        | 344.17        | 834.71           | 2.43        | 1.64E-10         | 2.03E-07        |
| ENSMUSG00000062647 Rpl7a 1 chr2         | 241.87        | 142.9         | 340.84           | 2.39        | 2.48E-10         | 2.91E-07        |
| ENSMUSG00000022822 Abcc5 -1 chr16       | 1108.69       | 668.21        | 1549.18          | 2.32        | 3.44E-10         | 3.86E-07        |
| ENSMUSG00000091793 Rian 1 chr12         | 590.5         | 355.24        | 825.77           | 2.32        | 6.07E-10         | 6.49E-07        |
| ENSMUSG00000024299 Adamts10 1 chr17     | 1348.12       | 817.15        | 1879.09          | 2.3         | 9.85E-10         | 1.01E-06        |
| ENSMUSG00000028248 Sfrs18 1 chr4        | 1812.61       | 1123.07       | 2502.14          | 2.23        | 1.05E-09         | 1.03E-06        |
| ENSMUSG00000041921 Metap1d 1 chr2       | 327.74        | 208.31        | 447.17           | 2.15        | 1.97E-09         | 1.85E-06        |
| ENSMUSG00000027102 Hoxd8 1 chr2         | 210.52        | 134.85        | 286.19           | 2.12        | 4.47E-09         | 4.04E-06        |
| ENSMUSG00000043219 Hoxa6 -1 chr6        | 166.62        | 107.68        | 225.57           | 2.09        | 7.92E-09         | 6.90E-06        |
| ENSMUSG00000092341 Malat1 -1 chr19      | 2104.82       | 1370.63       | 2839             | 2.07        | 9.23E-09         | 7.76E-06        |
| ENSMUSG00000037266 D4Wsu53e 1 chr4      | 1349          | 878.53        | 1819.47          | 2.07        | 1.01E-08         | 8.23E-06        |
| ENSMUSG00000029068 Ccni2 1 chr4         | 1135.04       | 749.72        | 1520.36          | 2.03        | 1.27E-08         | 9.98E-06        |
| ENSMUSG00000048126 Col6a3 -1 chr1       | 1595.15       | 1070.74       | 2119.56          | 1.98        | 1.43E-08         | 1.08E-05        |
| ENSMUSG00000066842 Hmcn1 -1 chr1        | 2054.9        | 1412.9        | 2696.9           | 1.91        | 1.53E-08         | 1.13E-05        |

Table S1. Genes up-regulated in the RNA-seq from wild-type versus *HoxD*<sup>Inv(TpSB1-Itga6)</sup> autopods.

## Supplementary table 2

| <b>Position</b> | <b>Clone ID</b> | <b>Chr</b> | <b>Size (kb)</b> | <b>Start (mm10)</b> | <b>End (mm10)</b> |
|-----------------|-----------------|------------|------------------|---------------------|-------------------|
| <i>Dlx1</i>     | WI1-562-O4      | 2          | 39228            | 71506627            | 71545855          |
| <i>Atf2</i>     | WI1-1164F22     | 2          | 39368            | 73809214            | 73848582          |
| Island I        | WI1-2854P13     | 2          | 37831            | 73967847            | 74005678          |
| Island II       | WI1-109P4       | 2          | 39879            | 74064904            | 74104783          |
| Island III      | WI1-1404J11     | 2          | 40776            | 74202498            | 74243274          |
| Island IV-V     | WI1-2334J2      | 2          | 36664            | 74259804            | 74296468          |
| <i>GCR</i>      | WI1-2157A11     | 2          | 39429            | 74404558            | 74443987          |
| <i>Hoxd13</i>   | WI1-469P2       | 2          | 38845            | 74636100            | 74674945          |
| <i>Hoxd8-12</i> | WI1-2777G14     | 2          | 38891            | 74673550            | 74712441          |
| <i>Alx4</i>     | CH29-163J23     | 2          | 199950           | 93468017            | 93667967          |

**Table S2.** List of fosmid and BAC clones used for 3D DNA-FISH. The genomic coordinates are given for mm10.
